# Supplementary material for: Peripheral Markers of Vascular Endothelial Dysfunction Show Independent but Additive Relationships with Brain-Based Biomarkers in Association with Functional Impairment in Alzheimer’s Disease
Source: PubMed Central journal article supplement — J Alzheimers Dis. 2021 Apr 20;80(4):1553–65. doi: 10.3233/JAD-200759 (PMC8150492; doi:10.3233/jad-200759), 2021-04-20
Supplement: jad-80-jad200759-s001.pdf [file jad-80-jad200759-s001.pdf]

## Supplementary Material

### Peripheral Markers of Vascular Endothelial Dysfunction Show Independent but Additive Relationships with Brain-Based Biomarkers in Association with Functional Impairment in Alzheimer's Disease

**Supplementary Table 1A.** Effect of *APOE* genotype on relationship of VCAM-1 to functional staging (CDR-SB)

| Dependent variable | Independent variable | Main effect p | Independent variable  | Main effect p | Level of <i>APOE4</i> genotype | CDR-SB mean estimate |
|--------------------|----------------------|---------------|-----------------------|---------------|--------------------------------|----------------------|
| CDR-SB             | VCAM-1               | 0.0032        | <i>APOE4</i> genotype | <0.0001       | <i>APOE</i> ε4 non-carrier     | 1.68 [1.50 ,1.88]    |
| –                  | –                    | –             | –                     | –             | <i>APOE</i> ε4 heterozygote    | 2.66 [2.39 ,2.96]    |
| –                  | –                    | –             | –                     | –             | <i>APOE</i> ε4 homozygote      | 3.02 [2.47 ,3.69]    |

**Supplementary Table 1B.** Effect of age on relationship of VCAM-1 to CDR-SB

| Dependent variable | Independent variable | Main effect p | Independent variable | Main effect p | Age slope          |
|--------------------|----------------------|---------------|----------------------|---------------|--------------------|
| CDR-SB             | VCAM-1               | 0.007         | Age                  | 0.1395        | 0.00 [-0.20, 0.00] |

**Supplementary Table 1C.** Effect of sex on relationship of VCAM-1 to CDR-SB

| Dependent variable | Independent variable | Main effect p | Independent variable | Main effect p | Interaction p | Level of sex | Sex slope          | p (slope non- zero) |
|--------------------|----------------------|---------------|----------------------|---------------|---------------|--------------|--------------------|---------------------|
| CDR-SB             | VCAM-1               | 0.0094        | Sex                  | 0.3001        | 0.2847        | Female       | 3.90 [0.52, 7.29]  | 0.0239              |
|                    |                      |               |                      |               |               | Male         | 1.63 [-0.80, 4.06] | 0.1888              |

*APOE4*, *APOE* ε4 allele; CDR-SB, clinical dementia rating-sum of boxes; VCAM-1, vascular cell adhesion molecule-1.
